# Supplementary material for: Progestins Related to Progesterone and Testosterone Elicit Divergent Human Endometrial Transcriptomes and Biofunctions
Source: PubMed Central journal article supplement (PMC7177488; doi:10.3390/ijms21072625), 2020-04-09

Supplementary Table 1. IGFBP1 Protein level in different treatments.

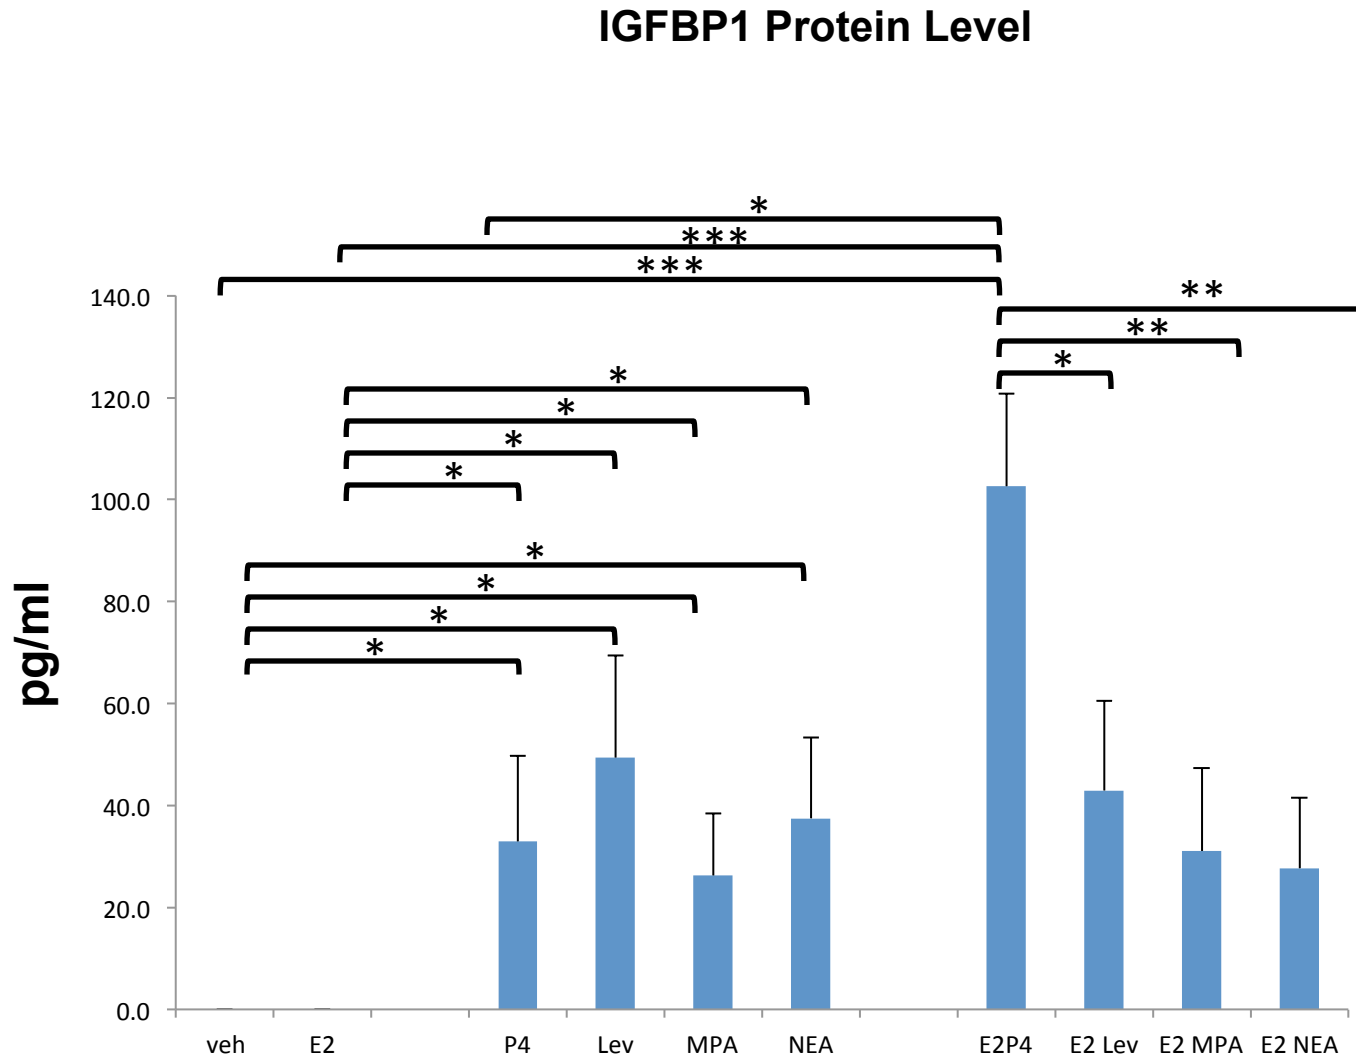

Supplement: ijms-21-02625-s001.pdf [file ijms-21-02625-s001.pdf]
